# Supplementary material for: A phenothiazine-based ratiometric fluorescence probe for the detection of hydroxylamine in real water and living cells
Source: Royal Society of Chemistry journal article supplement (doi:10.1039/d4ay00881b), 2024-01-01
Supplement: d4ay00881b1.pdf [file d4ay00881b1.pdf]

## Electronic Supplementary Information

# A phenothiazine-based ratiometric fluorescence probe for the detection of hydroxylamine in real water and living cells

Man Du<sup>a</sup>, Haohua Jiang<sup>a</sup>, Meimei Song<sup>a</sup>, Yue Zhang<sup>a,\*</sup>, Haijun Lv<sup>a</sup>, Shuchun

Zhao<sup>a</sup>, Hongxia Du<sup>a</sup>, Zhipeng Dong<sup>b,\*\*</sup>

*<sup>a</sup>College of Chemical and Pharmaceutical Engineering, Hebei University of Science and Technology, Shijiazhuang 050018, P. R. China;*

*<sup>b</sup>Hebei Lansheng Bio-Tech Co., Ltd, Shijiazhuang, 052263, China*

\*Corresponding author

\*\*Corresponding author

*E-mail addresses:* yuezhang@hebust.edu.cn (Yue Zhang), dzpkjcx@sohu.com

(Zhipeng Dong)

## Contents

|                                                                                                                                           |           |
|-------------------------------------------------------------------------------------------------------------------------------------------|-----------|
| <b>Table S1</b> Comparison of fluorescent probes for hydroxylamine (HA). .....                                                            | <b>3</b>  |
| <b>Fig. S1</b> <sup>1</sup> H NMR spectrum of compound 2-Methoxy-10-butyl-10H-phenothiazine ( <b>1</b> )<br>in CDCl <sub>3</sub> . .....  | <b>4</b>  |
| <b>Fig. S2</b> <sup>13</sup> C NMR spectrum of compound 2-Methoxy-10-butyl-10H-phenothiazine ( <b>1</b> )<br>in CDCl <sub>3</sub> . ..... | <b>4</b>  |
| <b>Fig. S3</b> HRMS spectrum of compound 2-Methoxy-10-butyl-10H-phenothiazine ( <b>1</b> ). .                                             | <b>5</b>  |
| <b>Fig. S4</b> <sup>1</sup> H NMR spectrum of the probe <b>PCHO</b> in CDCl <sub>3</sub> . .....                                          | <b>5</b>  |
| <b>Fig. S5</b> <sup>13</sup> C NMR spectrum of the probe <b>PCHO</b> in CDCl <sub>3</sub> . .....                                         | <b>6</b>  |
| <b>Fig. S6</b> HRMS spectrum of the probe <b>PCHO</b> . .....                                                                             | <b>6</b>  |
| <b>Fig. S7</b> <sup>1</sup> H NMR spectrum of <b>PCHO-HA</b> in CDCl <sub>3</sub> . .....                                                 | <b>7</b>  |
| <b>Fig. S8</b> <sup>13</sup> C NMR spectrum of <b>PCHO-HA</b> in CDCl <sub>3</sub> . .....                                                | <b>7</b>  |
| <b>Fig. S9</b> HRMS spectrum of the probe <b>PCHO</b> in absence (a) and presence of HA (b). .                                            | <b>8</b>  |
| DFT Calculation of the probe <b>PCHO</b> . .....                                                                                          | <b>9</b>  |
| DFT Calculation of <b>PCHO-HA</b> . .....                                                                                                 | <b>11</b> |
| <b>Fig. S10</b> Cytotoxicity assays of the probe <b>PCHO</b> at different concentrations for<br>HUVEC cells. ....                         | <b>13</b> |
| <b>References</b> .....                                                                                                                   | <b>14</b> |

**Table S1** Comparison of fluorescent probes for hydroxylamine (HA).

| Probes                                                                              | $\lambda_{\text{ex}}/\lambda_{\text{em}}$<br>(nm)                                                 | LOD<br>( $\mu\text{M}$ ) | Linear<br>range<br>( $\mu\text{M}$ ) | Application                                                                                | Ref.      |
|-------------------------------------------------------------------------------------|---------------------------------------------------------------------------------------------------|--------------------------|--------------------------------------|--------------------------------------------------------------------------------------------|-----------|
| 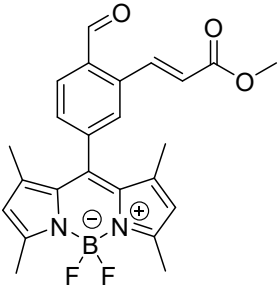   | 465/510                                                                                           | —                        | 0~20                                 | —                                                                                          | [1]       |
| N-CDs/ $\text{Fe}^{3+}$                                                             | 360/477                                                                                           | 0.246                    | 0~100                                | —                                                                                          | [2]       |
|   | 540/637                                                                                           | 2.16                     | 0~80                                 | Imaging in living cells                                                                    | [3]       |
| DNA-CuNPs                                                                           | 340/588                                                                                           | 0.022 mM                 | 0.1-1.2 mM                           | Detection in real water samples                                                            | [4]       |
|  | 365/465                                                                                           | 28                       | 0~1000                               | —                                                                                          | [5]       |
|  | $\lambda_{\text{ex}}=380$ nm;<br>$\lambda_{\text{em1}}=519$ nm;<br>$\lambda_{\text{em2}}=478$ nm; | 0.19                     | 0~1000                               | Test strip with Smartphone;<br>Detection in real water samples;<br>Imaging in living cells | This work |

“—“ Not mentioned.

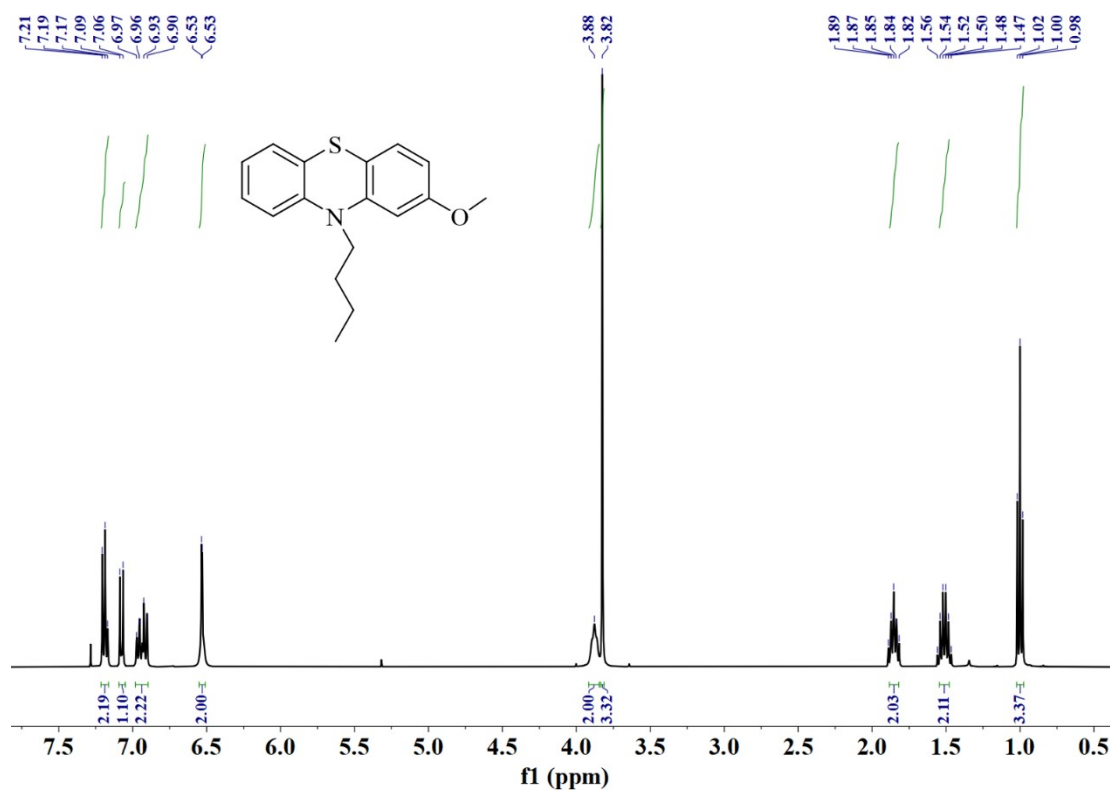

**Fig. S1** <sup>1</sup>H NMR spectrum of compound 2-Methoxy-10-butyl-10H-phenothiazine (**1**) in CDCl<sub>3</sub>.

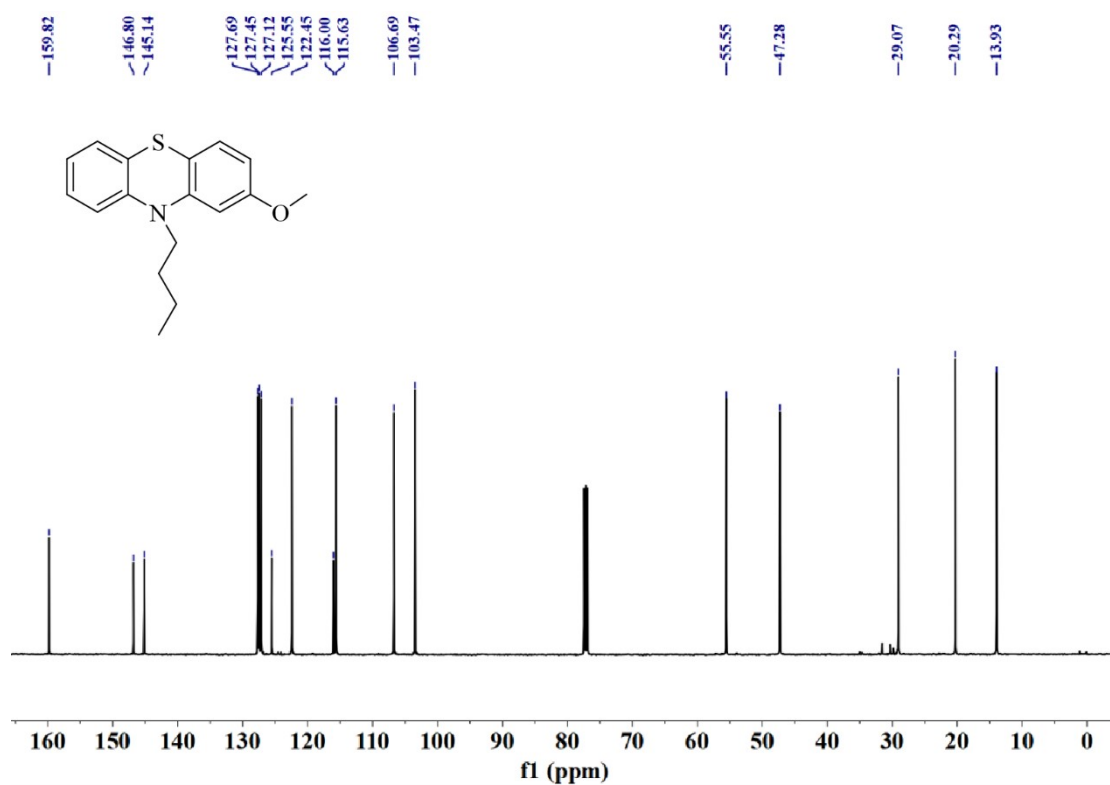

**Fig. S2** <sup>13</sup>C NMR spectrum of compound 2-Methoxy-10-butyl-10H-phenothiazine (**1**) in CDCl<sub>3</sub>.

probe-1\_20240619105602 #12 RT: 0.06 AV: 1 SB: 40 0.00-0.04 , 0.14-0.32 NL: 1.49E9  
T: FTMS + p ESI Full ms [160.0000-2000.0000]

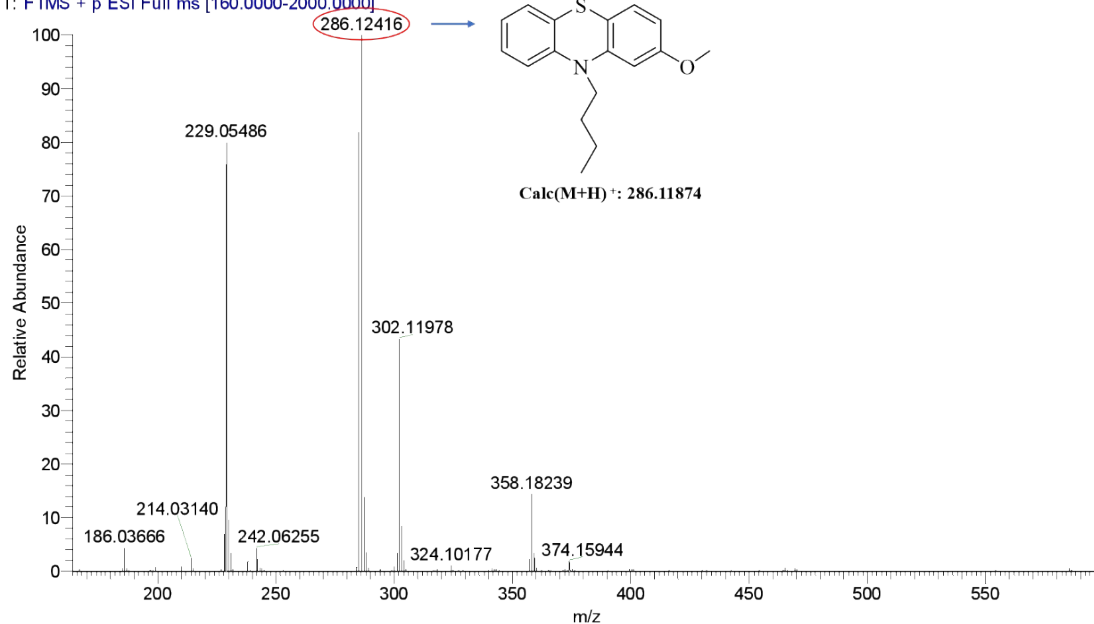

Fig. S3 HRMS spectrum of compound 2-Methoxy-10-butyl-10H-phenothiazine (**1**).

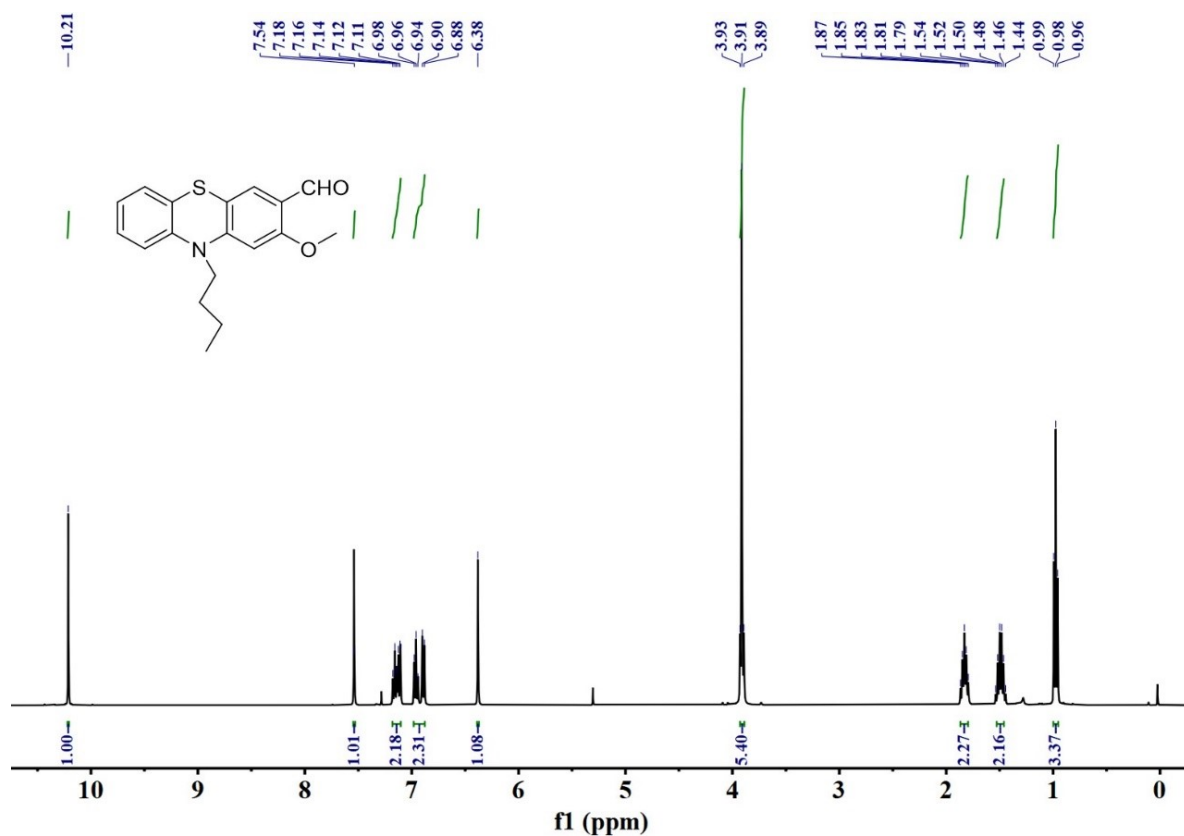

Fig. S4 <sup>1</sup>H NMR spectrum of the probe PCHO in CDCl<sub>3</sub>.

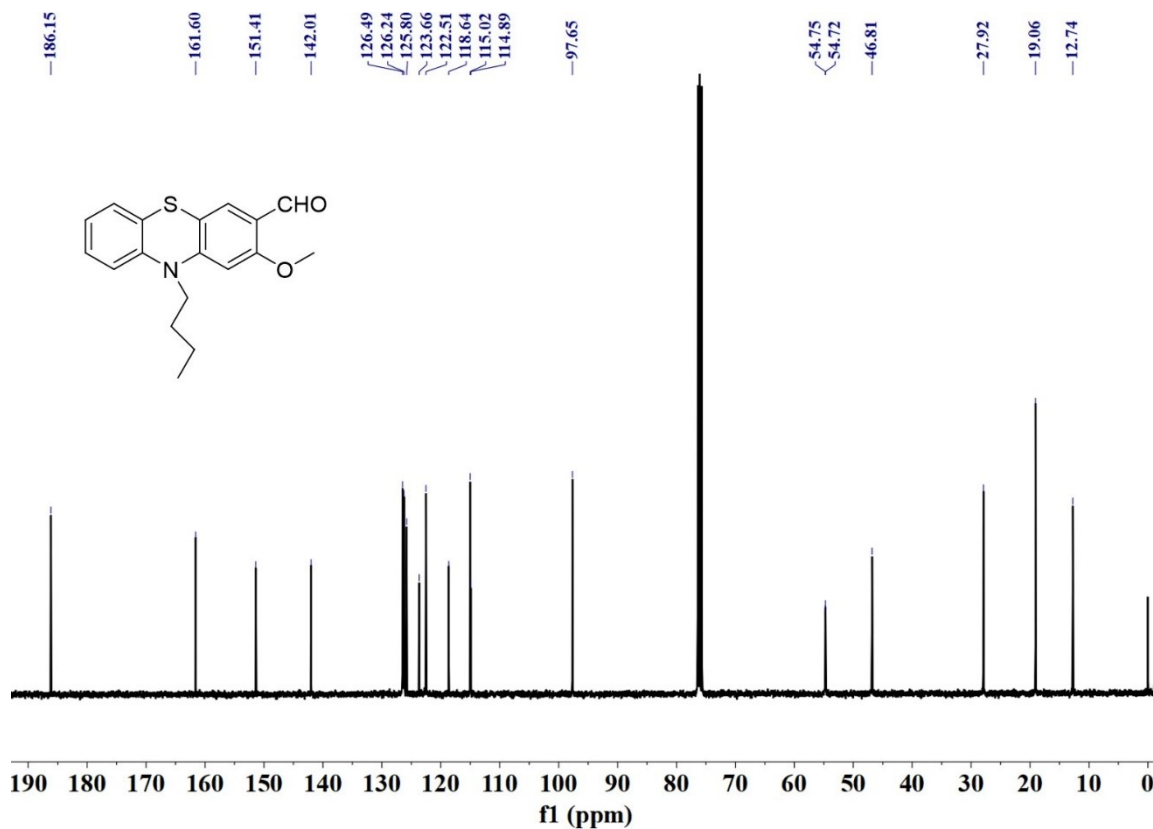

Fig. S5 <sup>13</sup>C NMR spectrum of the probe PCHO in CDCl<sub>3</sub>.

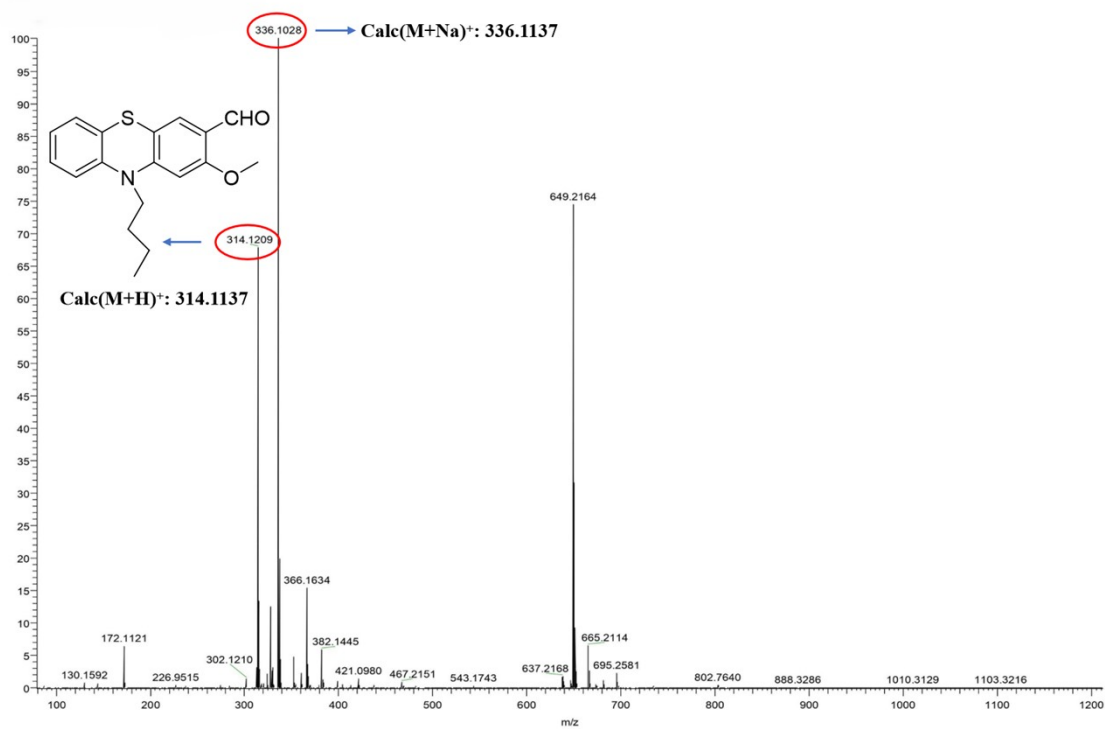

Fig. S6 HRMS spectrum of the probe PCHO.

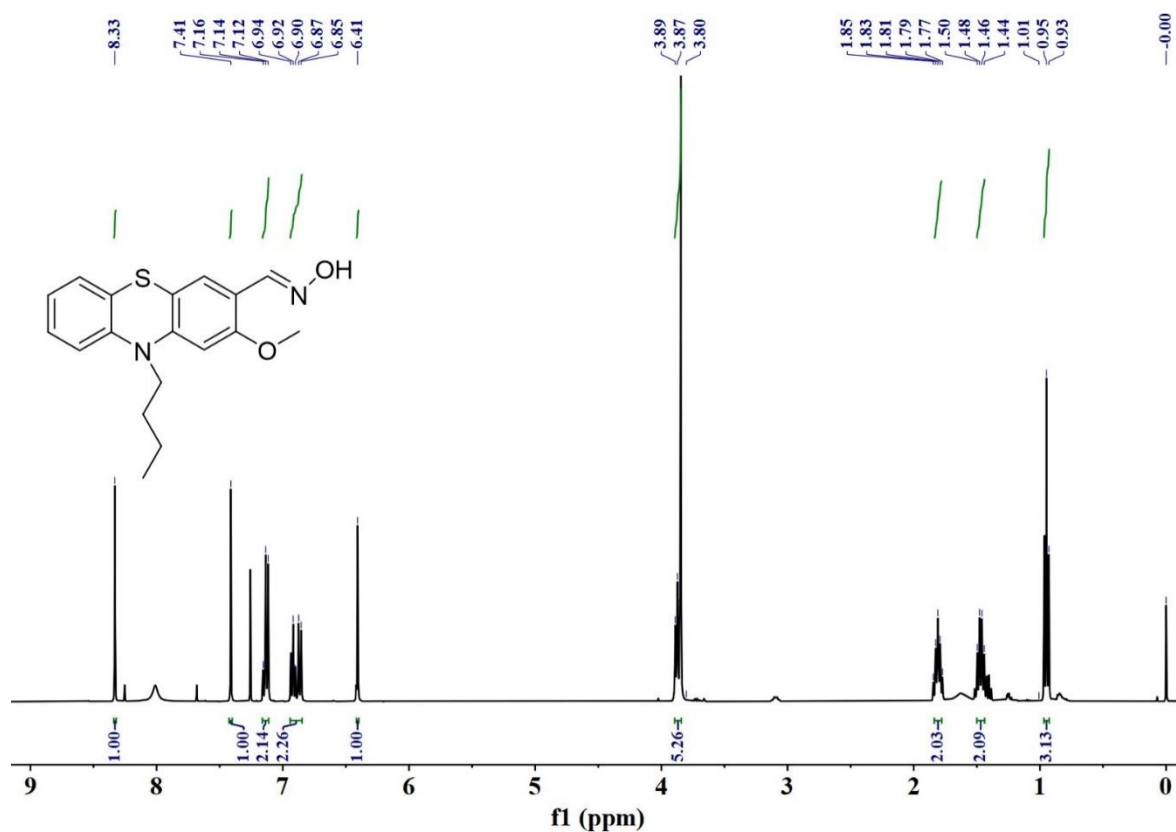

Fig. S7 <sup>1</sup>H NMR spectrum of PCHO-HA in CDCl<sub>3</sub>.

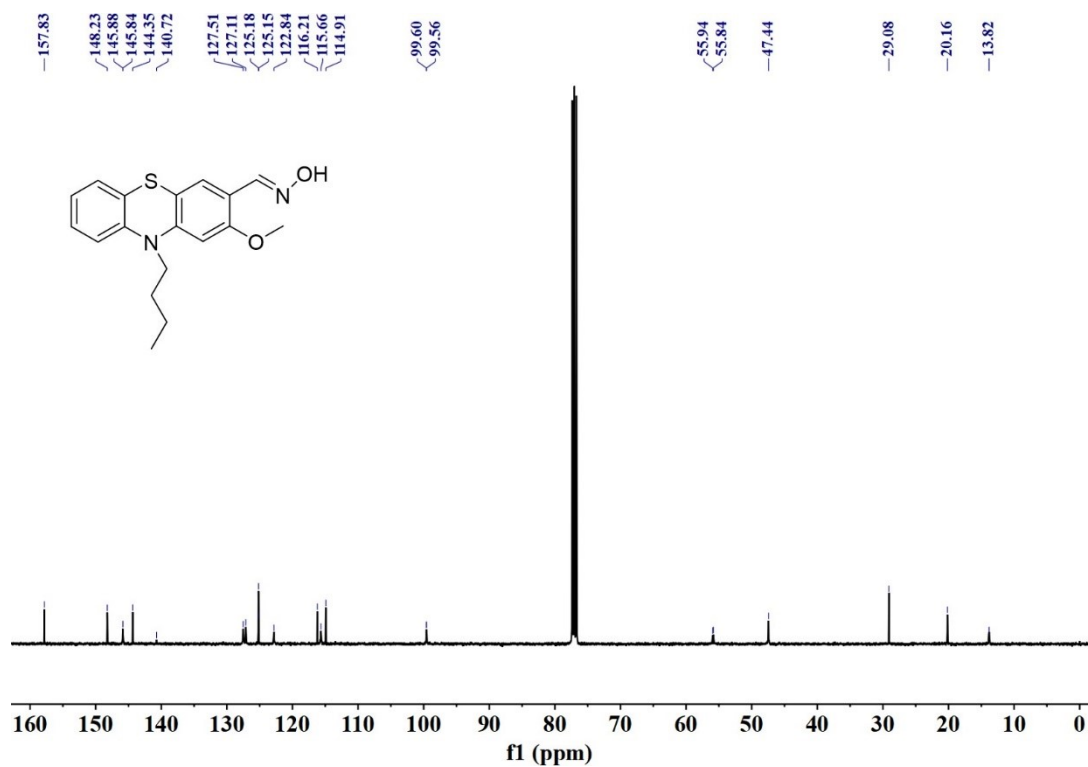

Fig. S8 <sup>13</sup>C NMR spectrum of PCHO-HA in CDCl<sub>3</sub>.

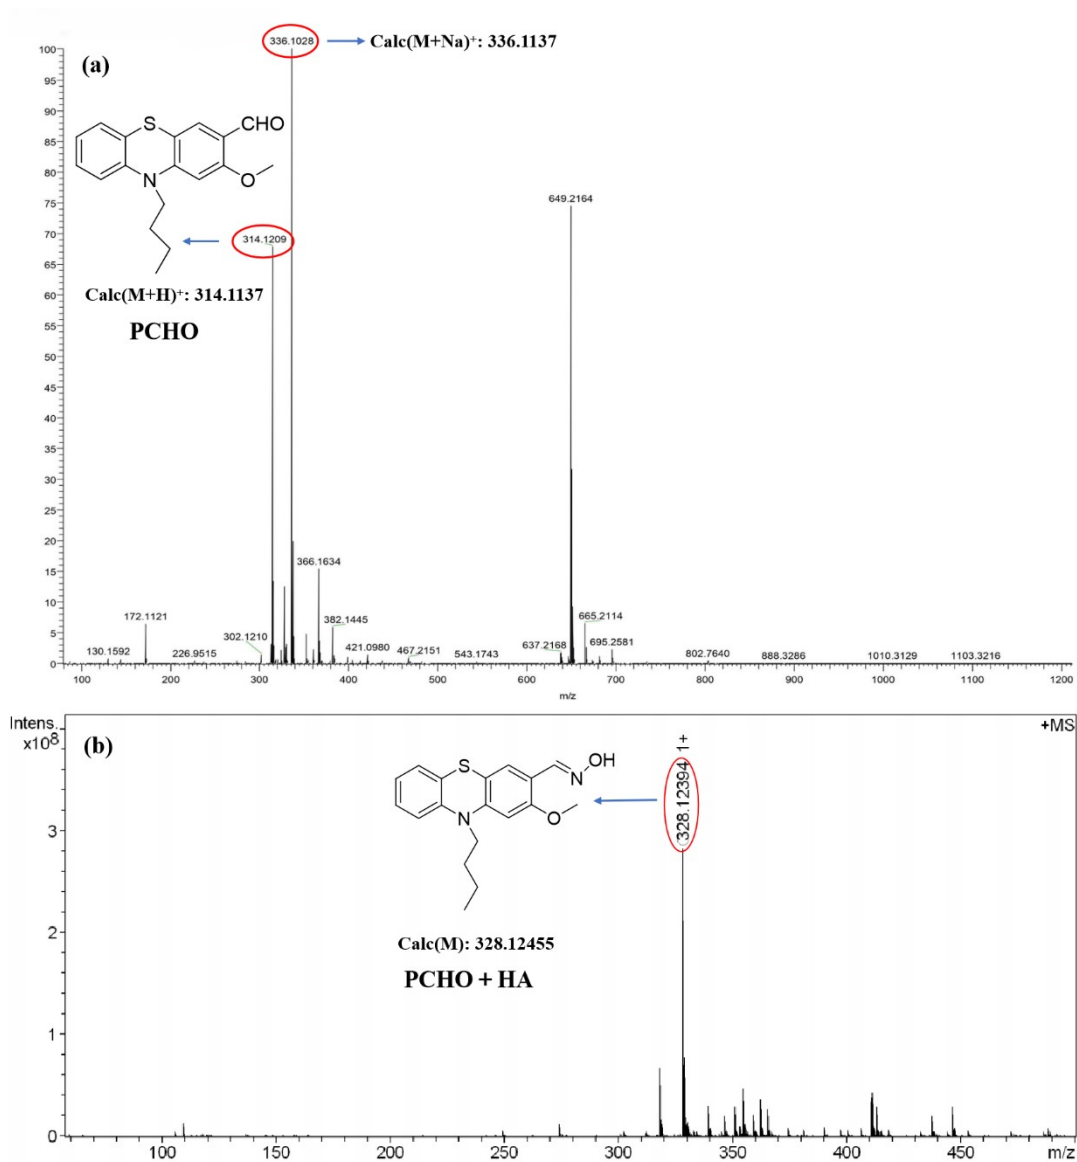

**Fig. S9** HRMS spectrum of the probe **PCHO** in absence (a) and presence of HA (b)



## DFT Culculation of the probe PCHO

# opt freq b3lyp/6-31g geom=connectivity

• Cartesian Coordinates for **PCHO**:

|   |             |             |             |
|---|-------------|-------------|-------------|
| C | -3.18693916 | -2.70179634 | 0.00263100  |
| C | -1.79177916 | -2.70179634 | 0.00263100  |
| C | -1.09424116 | -1.49404534 | 0.00263100  |
| C | -1.79189516 | -0.28553634 | 0.00143200  |
| C | -3.18672016 | -0.28561434 | 0.00095300  |
| C | -3.88432116 | -1.49382034 | 0.00194900  |
| H | -3.73669816 | -3.65411334 | 0.00308100  |
| H | -1.24227116 | -3.65430934 | 0.00394600  |
| H | -3.73684216 | 0.66666666  | 0.00000000  |
| H | -4.98392516 | -1.49363734 | 0.00176900  |
| S | -0.90131253 | 1.25565234  | 0.00133650  |
| N | 0.37575859  | -1.49393840 | 0.00347850  |
| C | 1.36190929  | -0.06134600 | 0.00466102  |
| C | 2.75706929  | -0.06134600 | 0.00466102  |
| C | 3.45460729  | 1.14640500  | 0.00466102  |
| C | 2.75695329  | 2.35491400  | 0.00346202  |
| C | 1.36212829  | 2.35483600  | 0.00298302  |
| C | 0.66452729  | 1.14663000  | 0.00397902  |
| H | 3.30657729  | -1.01385900 | 0.00597602  |
| H | 0.81200629  | 3.30711700  | 0.00203002  |
| C | 0.96722801  | -2.62321335 | 0.00282562  |
| C | 2.47394601  | -2.62321335 | 0.00282562  |
| H | 0.57271501  | -3.14584635 | -0.90201638 |
| H | 0.57279301  | -3.14571235 | 0.90780162  |
| C | 3.03153701  | -4.03106435 | 0.00300362  |
| H | 2.85114001  | -2.07317535 | -0.89961038 |

|   |            |             |             |
|---|------------|-------------|-------------|
| H | 2.84753901 | -2.09262835 | 0.91831762  |
| C | 4.53827101 | -4.03103635 | 0.00293862  |
| H | 2.65436201 | -4.58108835 | 0.90542162  |
| H | 2.65429801 | -4.58128935 | -0.89927138 |
| H | 4.92707301 | -5.07783235 | 0.00308762  |
| H | 4.93258201 | -3.50841035 | -0.90201738 |
| H | 4.93266201 | -3.50811935 | 0.90769162  |
| O | 4.88460705 | 1.14650903  | 0.00548546  |
| C | 5.36185198 | 2.49452048  | 0.00703612  |
| H | 5.00428624 | 2.99846630  | 0.88058369  |
| H | 6.43185101 | 2.49405991  | 0.00840204  |
| H | 5.00651787 | 2.99968674  | -0.86671712 |
| C | 3.52745736 | 3.68830197  | 0.00337940  |
| H | 4.59745404 | 3.68577865  | 0.00424234  |
| O | 2.90299229 | 4.78082784  | 0.00230049  |

## DFT Culculation of PCHO-HA

# opt freq b3lyp/6-31g geom=connectivity

• Cartesian Coordinates for **PCHO-HA**:

|   |             |             |             |
|---|-------------|-------------|-------------|
| C | -3.81851812 | -2.70179634 | 0.00263100  |
| C | -2.42335812 | -2.70179634 | 0.00263100  |
| C | -1.72582012 | -1.49404534 | 0.00263100  |
| C | -2.42347412 | -0.28553634 | 0.00143200  |
| C | -3.81829912 | -0.28561434 | 0.00095300  |
| C | -4.51590012 | -1.49382034 | 0.00194900  |
| H | -4.36827712 | -3.65411334 | 0.00308100  |
| H | -1.87327412 | 0.66660666  | 0.00137300  |
| H | -4.36842112 | 0.66666666  | 0.00000000  |
| H | -5.61550412 | -1.49363734 | 0.00176900  |
| S | 0.05417958  | -1.49391585 | 0.00365723  |
| N | -1.68878543 | -3.97509908 | 0.00438887  |
| C | 0.82191732  | -5.25095373 | 0.00531073  |
| C | 2.21707732  | -5.25095373 | 0.00531073  |
| C | 2.91461532  | -4.04320273 | 0.00531073  |
| C | 2.21696132  | -2.83469373 | 0.00411173  |
| C | 0.82213632  | -2.83477173 | 0.00363273  |
| C | 0.12453532  | -4.04297773 | 0.00462873  |
| H | 0.27215832  | -6.20327073 | 0.00576073  |
| H | 2.76716132  | -1.88255073 | 0.00405273  |
| C | -1.94672910 | -5.13863760 | -0.12343947 |
| C | -3.39296920 | -5.53253403 | -0.27652221 |
| H | -1.50773056 | -5.59832981 | 0.79497664  |
| H | -1.34985966 | -5.47912297 | -1.00399743 |
| C | -3.55290657 | -7.03402026 | -0.39015023 |
| H | -3.98040836 | -5.16085481 | 0.60437372  |

|   |             |             |             |
|---|-------------|-------------|-------------|
| H | -3.81307736 | -5.05901434 | -1.20307820 |
| C | -4.99917516 | -7.42789818 | -0.54316886 |
| H | -2.96549095 | -7.40569214 | -1.27102964 |
| H | -3.12291006 | -7.52462989 | 0.52284602  |
| H | -5.09333883 | -8.53757254 | -0.62505230 |
| H | -5.59595768 | -7.08725678 | 0.33738694  |
| H | -5.43814007 | -6.96790645 | -1.46147266 |
| O | 2.93166164  | -6.48960878 | 0.00702076  |
| C | 4.33226338  | -6.23249920 | 0.13782381  |
| H | 4.86234655  | -7.16073638 | 0.18565245  |
| H | 4.67220112  | -5.67076739 | -0.70704287 |
| H | 4.51024473  | -5.67361121 | 1.03273545  |
| C | 4.45461506  | -4.04309070 | 0.00619858  |
| H | 4.98784603  | -4.97075678 | 0.00681492  |
| N | 5.10576619  | -2.92532365 | 0.00620180  |
| O | 6.08934475  | -2.45119950 | -0.46817205 |
| H | 6.70318490  | -3.17996652 | -0.35112971 |

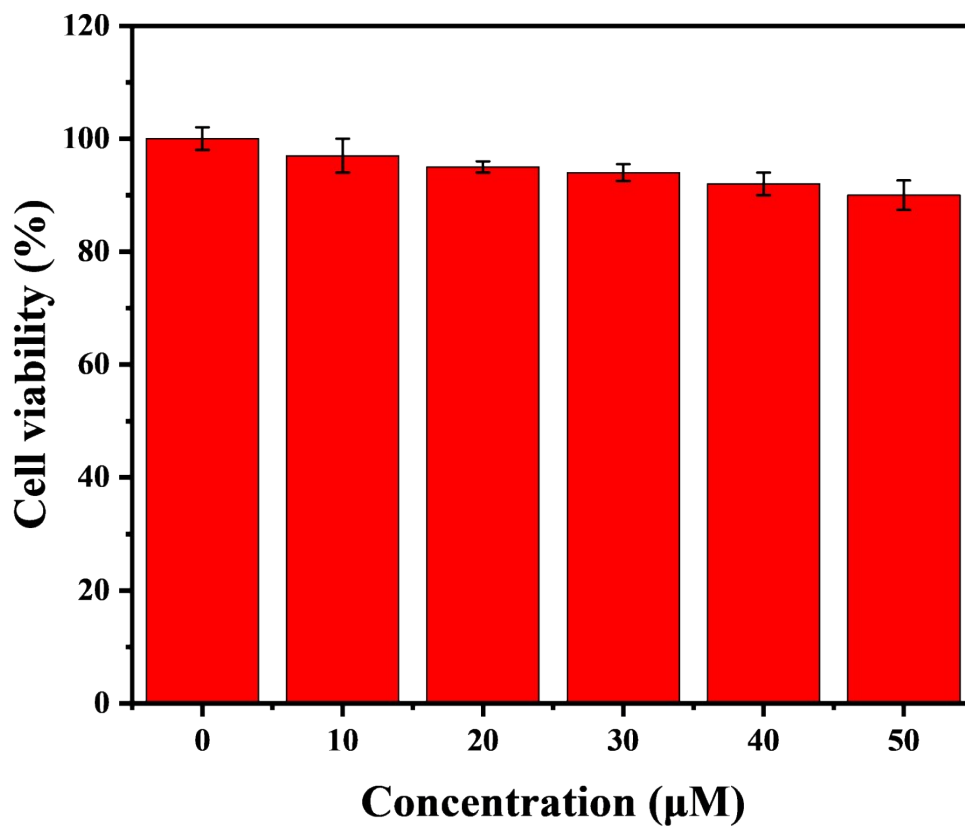

**Fig. S10** Cytotoxicity assays of the probe **PCHO** at different concentrations for HUVEC cells.

## References

- [1] A. C. Sedgwick, R. S. L. Chapman, J. E. Gardiner, L. R. Peacock, G Kim, J. Yoon, S. D. Bull and T. D. James, *Chem. Commun.*, 2017, **53**, 10441-10443.
- [2] J. Y. Wu, Y. Dong, X. Y. Yang and C. Yao, *Opt. Mater.*, 2019, **94**, 121-129.
- [3] B. L. Dong, M. G. Tian, X. Q. Kong, W. H. Song, Y. R. Lu and W. Y. Lin, *Anal. Chem.*, 2019, **91**, 11397-11402.
- [4] Q. W. Song, C. Z. Chen, W. H. Yu, L. X. Yang, K. F. Zhang, J. Zheng, X. Y. Du and H. K. Chen, *RSC Adv.*, 2019, **9**, 25976-25980.
- [5] P. Rana, L. Panda, N. Murmu, B. P. Bag and S. N. Sahu, *Org. Biomol. Chem.*, 2020, **18**, 5963-5971.
